# Supplementary material
Source: PubMed Central journal article supplement (PMC2872542)
Supplement: NIHMS178938-supplement-supplemental.pdf [file NIHMS178938-supplement-supplemental.pdf]

Figure S1

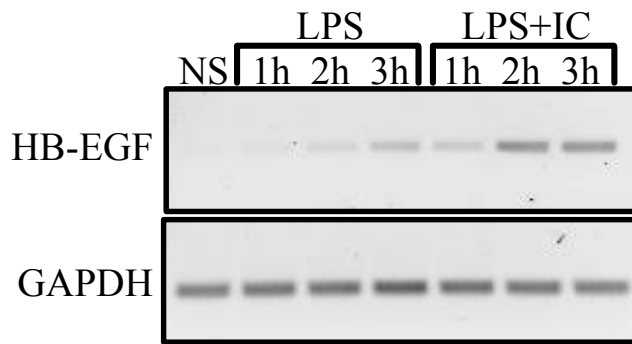

Figure S1- RAW264.7 cells were stimulated with LPS or LPS+IC for 1, 2, or 3h or left unstimulated (NS). HB-EGF and GAPDH mRNA were measured by RT-PCR. GAPDH is present as a loading control.

Figure S2

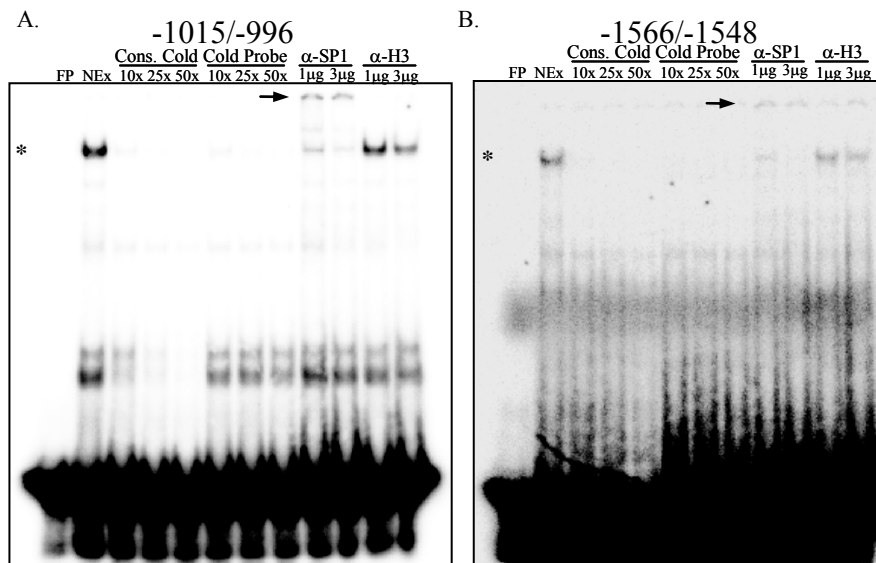

Figure S2- Sp1 binds potential Sp1 sites of the HB-EGF promoter *in vitro*. Experiments were performed as in figure 3A with labeled probes for the -1015/-996 (A) and -1566/-1548 (B) sites.

Figure S3

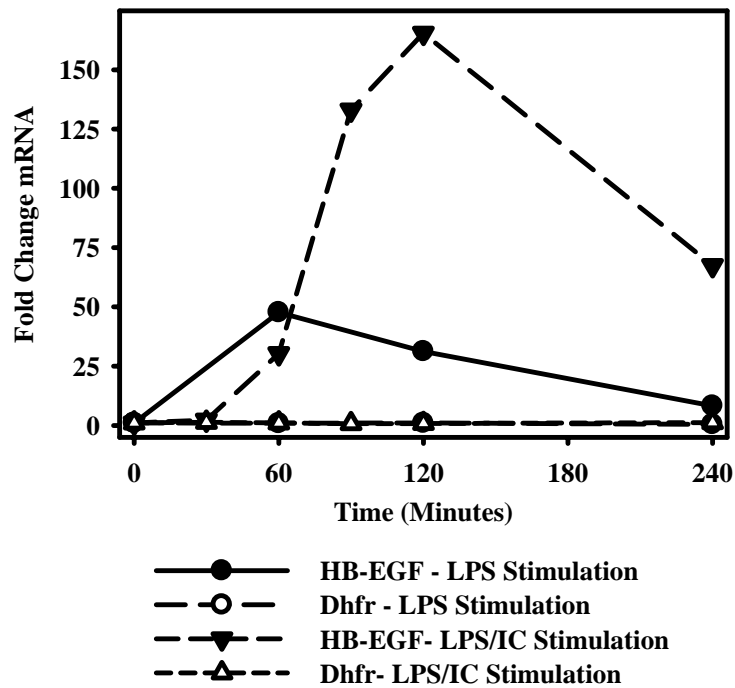

**Figure S3-** The expression of the house-keeping gene Dhfr is not affected by stimulation. Macrophages were stimulated with LPS or LPS/IC for 4h, during which the expression of Dhfr (open symbols) and HB-EGF (closed symbols) was assessed at various times by QRT-PCR.

Figure S4

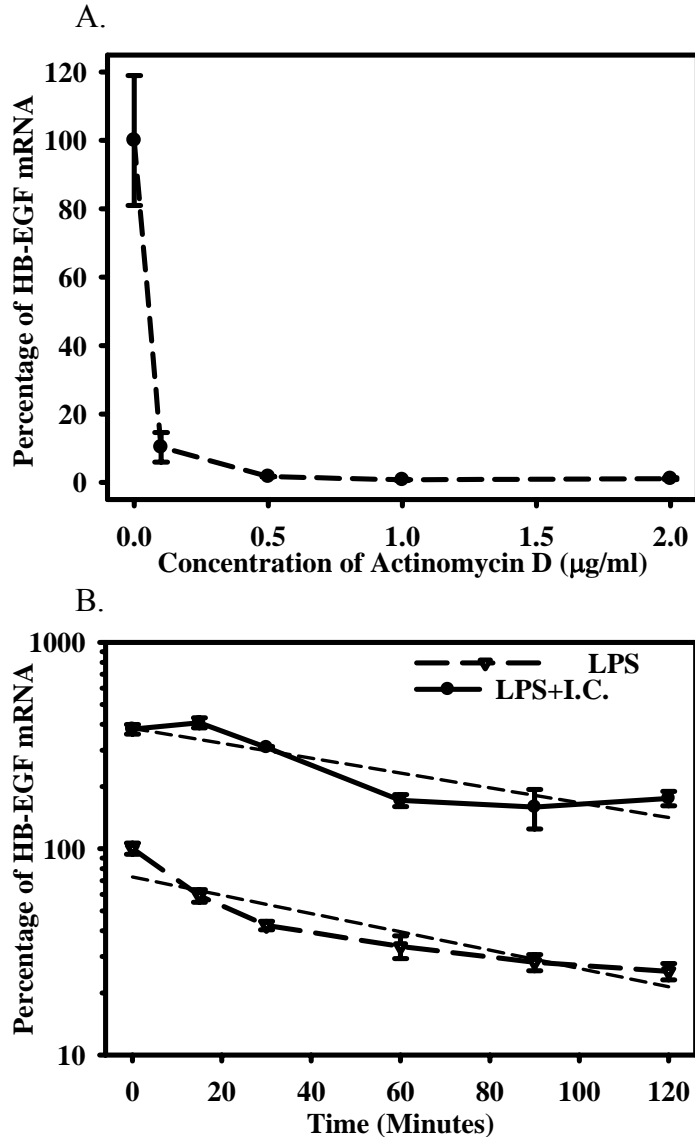

**Figure S4:** The induction of HB-EGF depends on new transcription and not on alterations in mRNA stability. (A) BMM $\Phi$  were pretreated for 1h with increasing concentrations of actinomycin D (0-2.0 $\mu\text{g/ml}$ ) then stimulated with LPS(10ng/ml)+IC for 2h. Relative HB-EGF mRNA was measured by QRT-PCR and presented as a percentage of HB-EGF mRNA present in macrophages stimulated in the presence of the vehicle control (0 $\mu\text{g/ml}$ ) (B) mRNA stability was examined in which BMM $\Phi$  were stimulated for 2h with LPS (10ng/ml) or LPS+IC before the addition of 0.5 $\mu\text{g/ml}$  of actinomycin D. Relative levels of HB-EGF mRNA were measured by QRT-PCR for 2h after stimulation. Error bars indicate  $\pm$  standard deviation. Figures are representative of at least three independent experiments.
